# Supplementary material for: A STING-based fluorescent polarization assay for monitoring activities of cyclic dinucleotide metabolizing enzymes
Source: Royal Society of Chemistry journal article supplement (doi:10.1039/d0cb00187b), 2020-12-17
Supplement: d0cb00187b1.pdf [file d0cb00187b1.pdf]

## A STING-based Fluorescent Polarization Assay for Monitoring Activities of Cyclic Dinucleotide Metabolizing Enzymes

Caroline W. Karanja,<sup>a</sup> Kofi S. Yeboah,<sup>a</sup> Wilson W.S. Ong<sup>a</sup> and Herman O. Sintim<sup>a,b,c\*</sup>

<sup>a</sup> Department of Chemistry, 560 Oval Drive, West Lafayette, Indiana 47907-2084

<sup>b</sup> Institute for Drug Discovery, Purdue University, 720 Clinic Drive, West Lafayette, IN 47907, USA.

<sup>c</sup> Purdue Institute of Inflammation, Immunology, and Infectious Disease, West Lafayette, IN, 47907, USA.

\*Corresponding author. Email: [hsintim@purdue.edu](mailto:hsintim@purdue.edu)

### Supplementary information

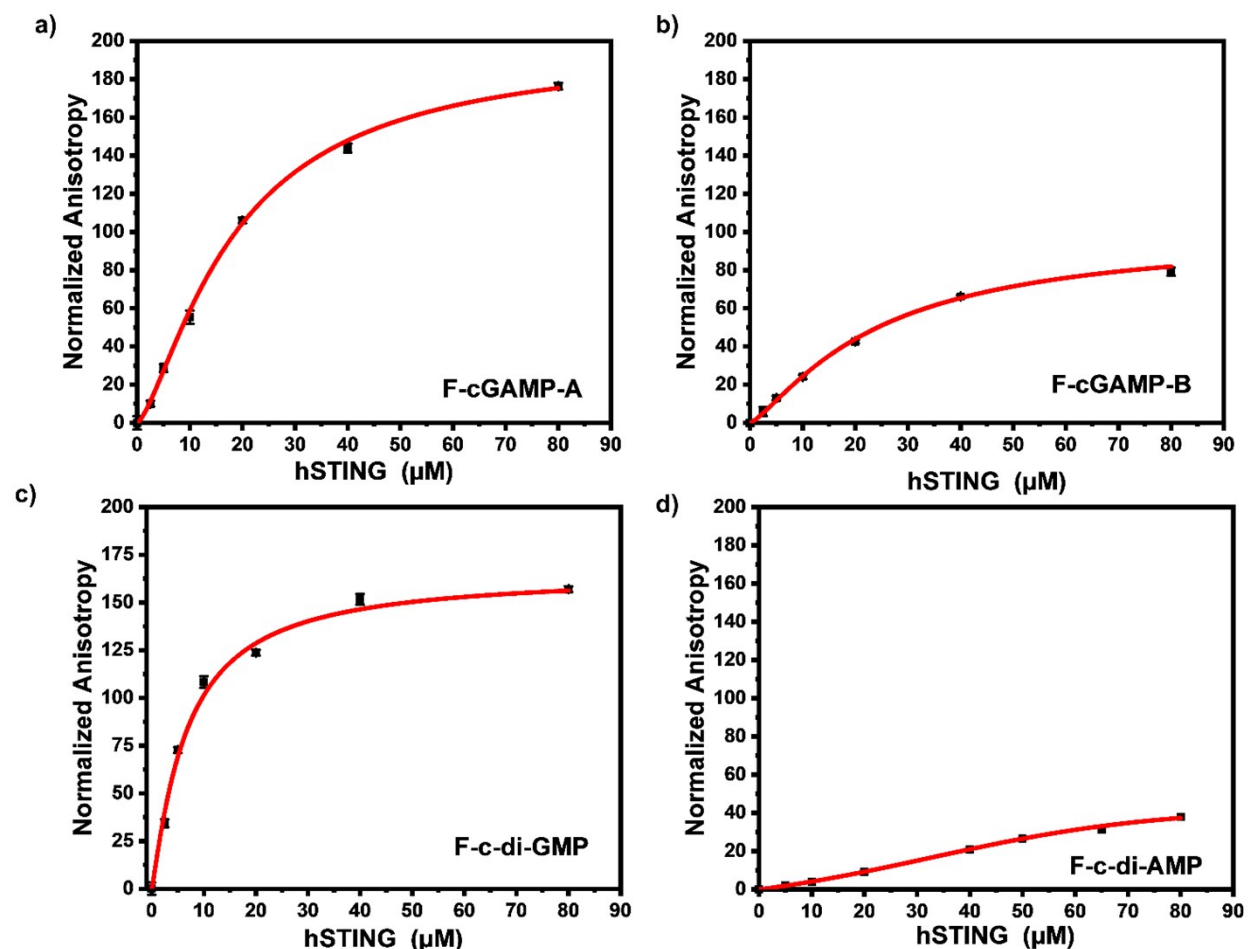

**Fig. S1:** hSTING titration curves a) Anisotropy of F-cGAMP-A in the presence of different concentrations of hSTING. b) Anisotropy of F-cGAMP-B in the presence of different concentrations of hSTING. c) Anisotropy of F-c-di-GMP in the presence of different concentrations of hSTING. d) Anisotropy of F-c-di-AMP in the presence of different concentrations of hSTING. Curves generated with origin in-built dose response function.

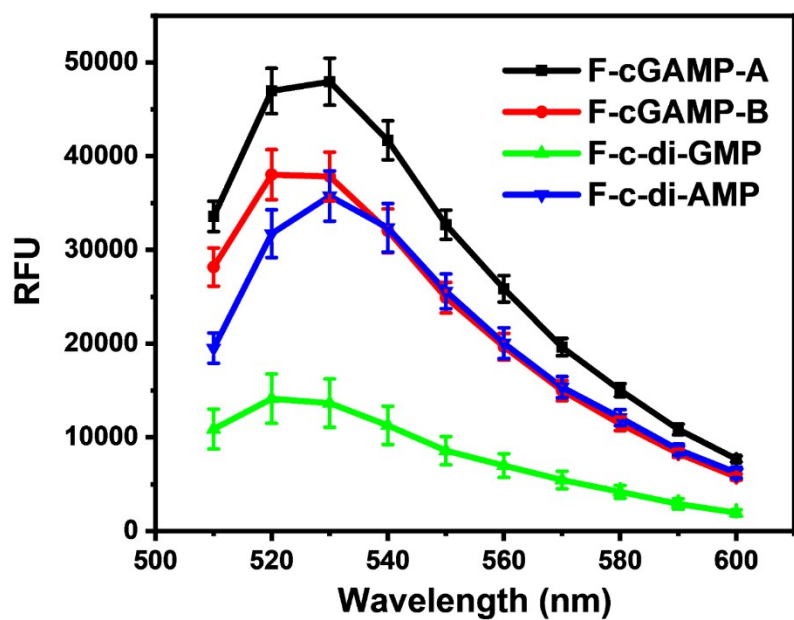

**Fig. S2:** F-cGAMP-A, F-cGAMP-B, F-c-di-GMP and F-c-di-AMP emission spectra. Emission spectra generated using 12.5 nM probe in 1x PBS. Excitation: 480/20 nm. Error bars represent standard deviation of n=3.

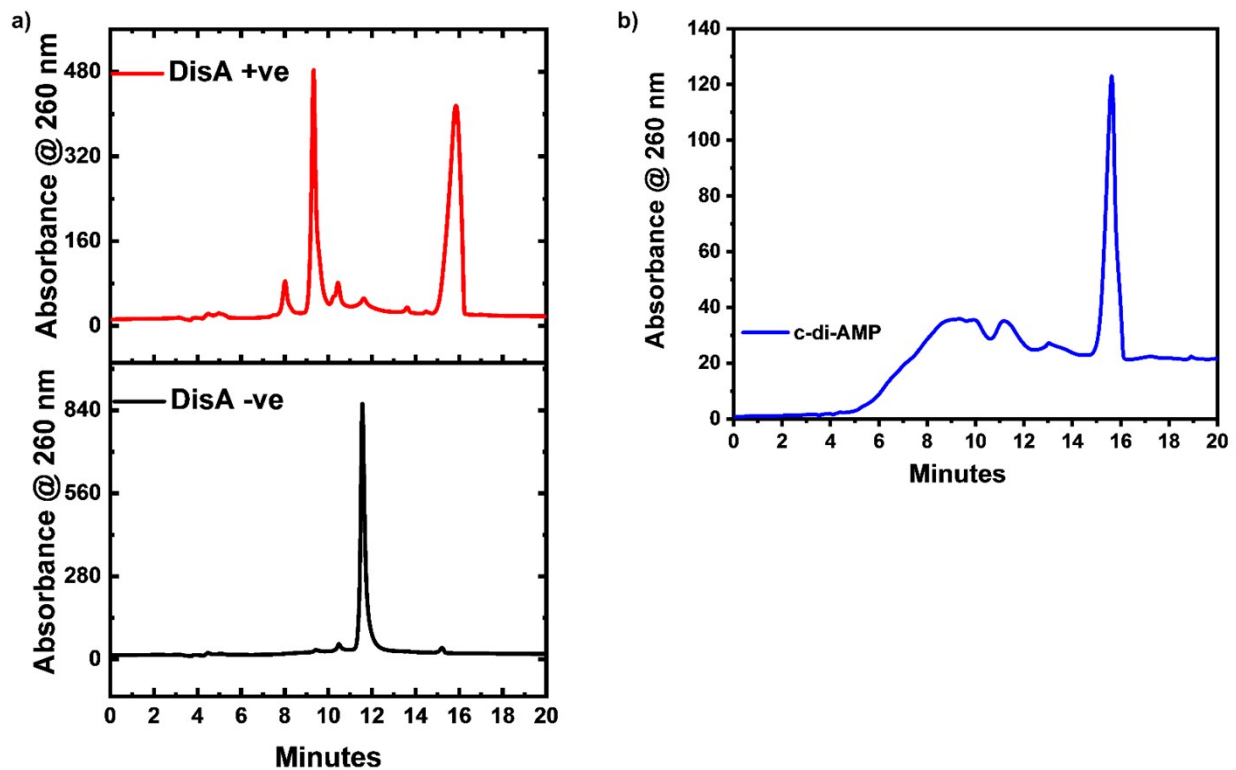

**Fig. S3:** HPLC traces of DisA reactions. a) HPLC traces of DisA +ve and DisA -ve reactions. DisA reactions: 1  $\mu\text{M}$  enzyme and 100  $\mu\text{M}$  ATP in 1x reaction buffer (40 mM Tris-HCl pH 7.5, 100 mM NaCl, and 10mM  $\text{MgCl}_2$ ) and incubate at 37  $^\circ\text{C}$  for 16 h. DisA -ve = Reactions containing no DisA. DisA +ve = Reactions containing DisA. b) HPLC trace of c-di-AMP standard.

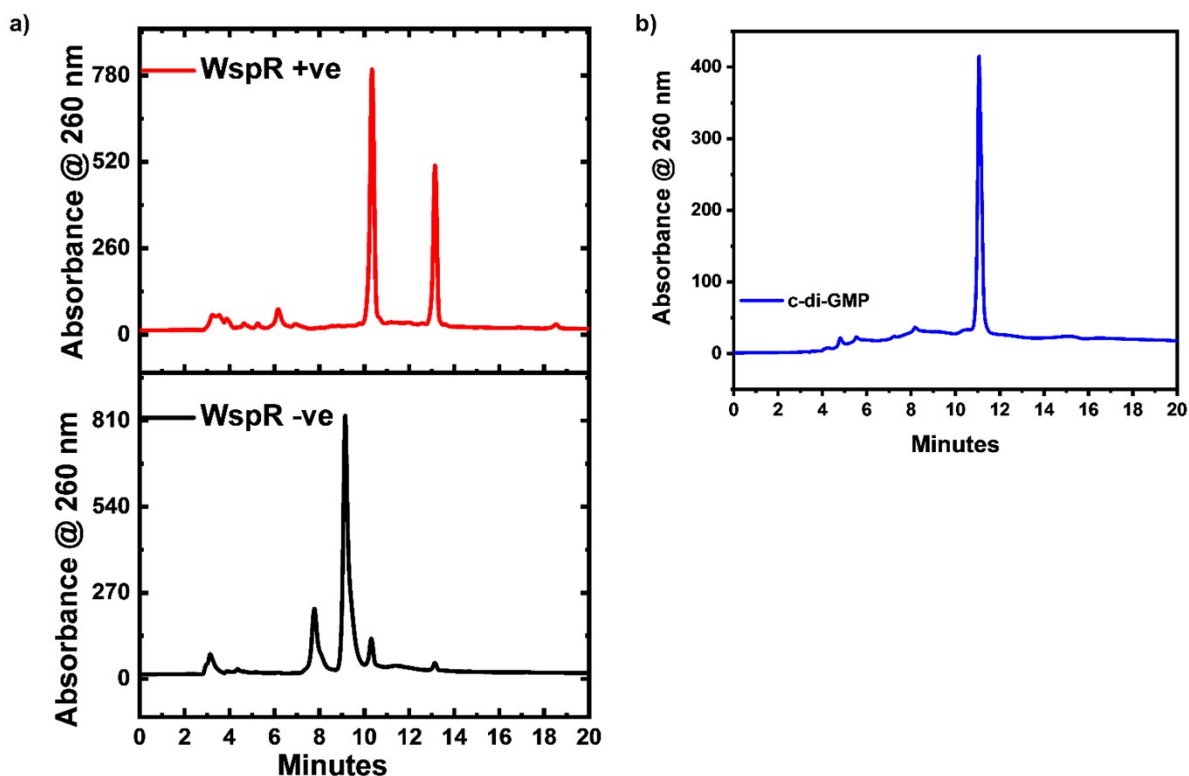

**Fig. S4:** HPLC traces of WspR reactions. a) HPLC traces of WspR +ve and WspR -ve reactions. WspR reactions: 11  $\mu\text{M}$  enzyme and 100  $\mu\text{M}$  GTP in with 1x reaction buffer (10 mM Tris-HCl pH 7.5, 100 mM NaCl, and 5mM  $\text{MgCl}_2$ ) and incubate at 37  $^\circ\text{C}$  for 16 h. WspR -ve = Reactions containing no WspR. WspR +ve = Reactions containing WspR. b) HPLC trace of c-di-GMP standard.

**Purity analysis of fluorescent cyclic dinucleotides via HPLC.** Fluorescent cyclic - dinucleotides were dissolved in water to yield a 100  $\mu\text{M}$  solution, and 100  $\mu\text{L}$  of the solution was subjected to HPLC analysis using a AGILENT Eclipse Plus C18- Packed column (particle size 3.5 $\mu\text{m}$ ; 4.6 x 100mm) (mobile phase = water and acetonitrile). Gradient is as follows: 0 – 16 min: 99 % - 87 % water, 1% -13% acetonitrile, 16 – 23 min: 87 % - 10 % water, 13 % - 90 % acetonitrile, 23 – 25 min: 10 % - 99 % water, 90 % -1 % acetonitrile. Nucleotides were detected by measuring absorbance at 260 nm.

**Mass analysis of fluorescent cyclic dinucleotides via MALDI-TOF MS.** Fluorescent cyclic dinucleotides were dissolved to yield a 10  $\mu\text{M}$  solution and was desalted prior to analysis using ZipTip pipette tips. A 10 mg/mL solution of  $\alpha$ -cyano-4-hydroxycinnamic acid in a 1:1 mixture of acetonitrile and 0.1% trifluoroacetic acid in water was used as the matrix. Aliquots of the desalted sample were combined with an equal volume of the matrix and transferred in 1  $\mu\text{L}$  quantities onto a 400-well MALDI plate. MALDI-TOF/TOF spectra was obtained using a 4800 Proteomics Analyzer (Applied Biosystems). Spectra were acquired in the positive ion mode.

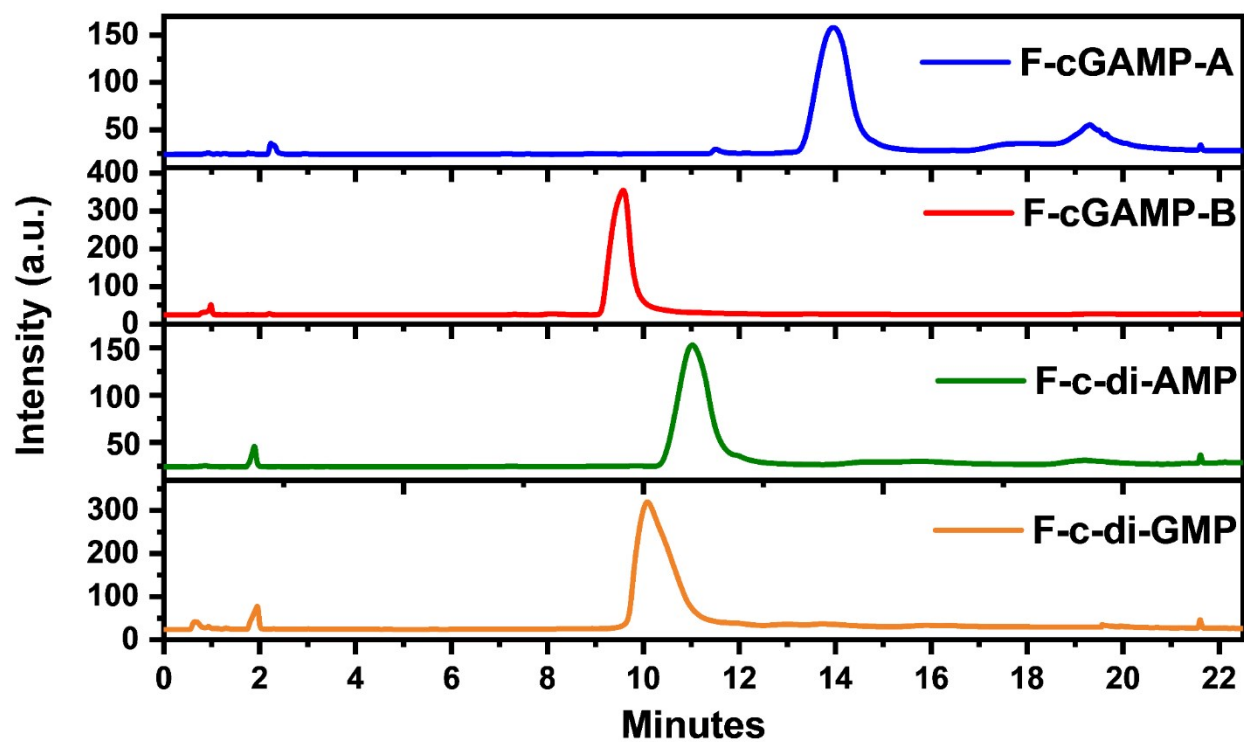

**Fig. S5:** HPLC traces of Fluorescent cyclic dinucleotides used for the fluorescence polarization assay. Fluorescent cyclic dinucleotides used have a purity of >90% as quantified by HPLC analysis.

a)

F-cGAMP-A

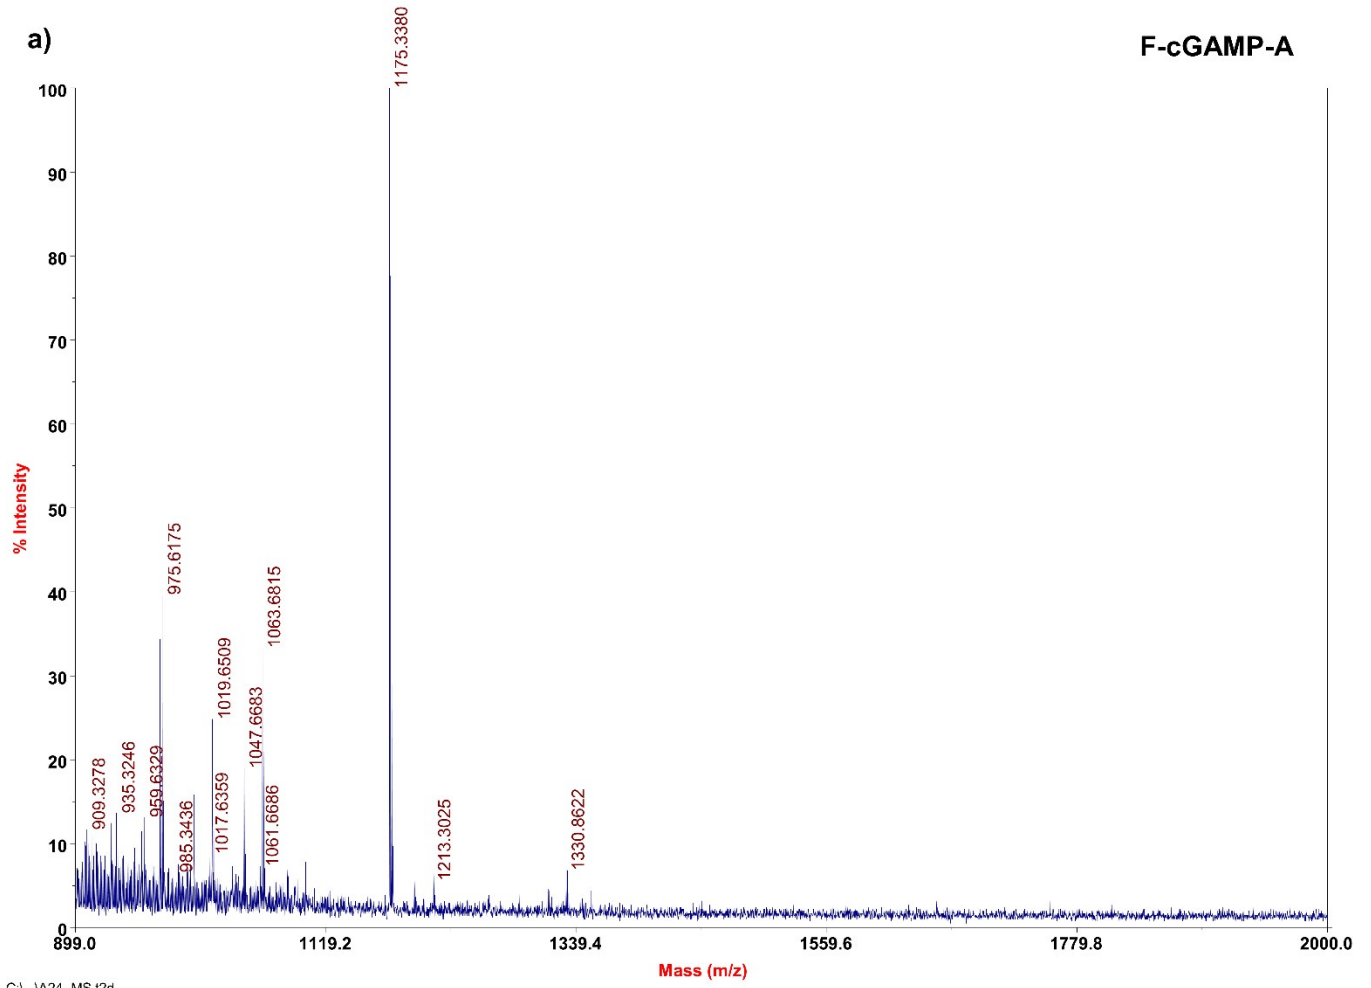

C:\...VA24\_MS.t2d  
Acquired:

b)

F-cGAMP-B

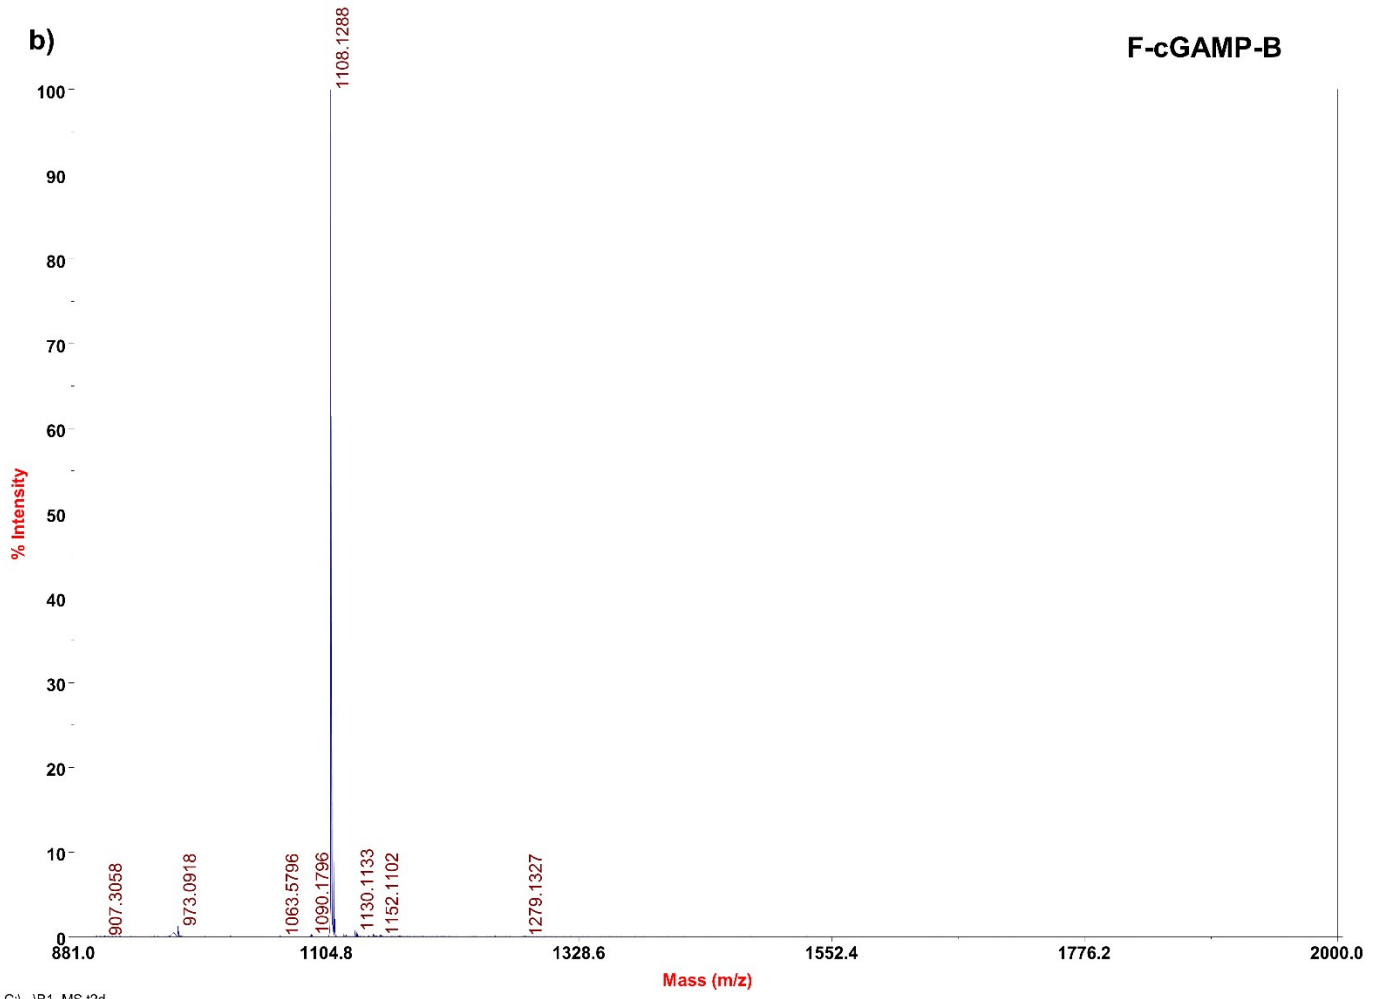

C:\...B1\_MS.t2d  
Acquired:

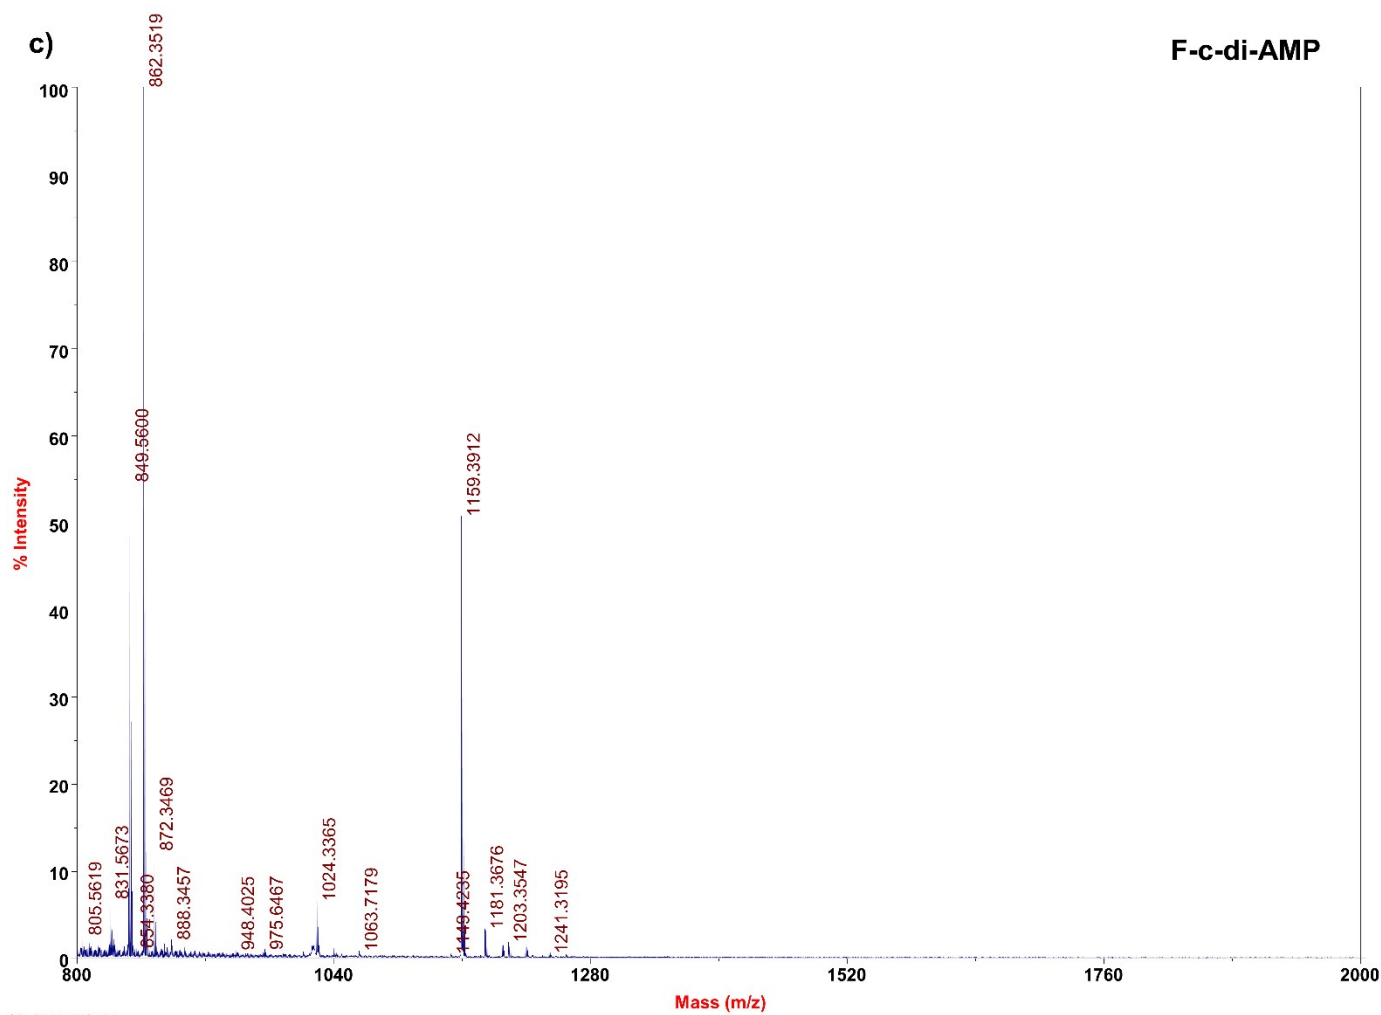

C:\...V19\_MS.t2d  
Acquired:



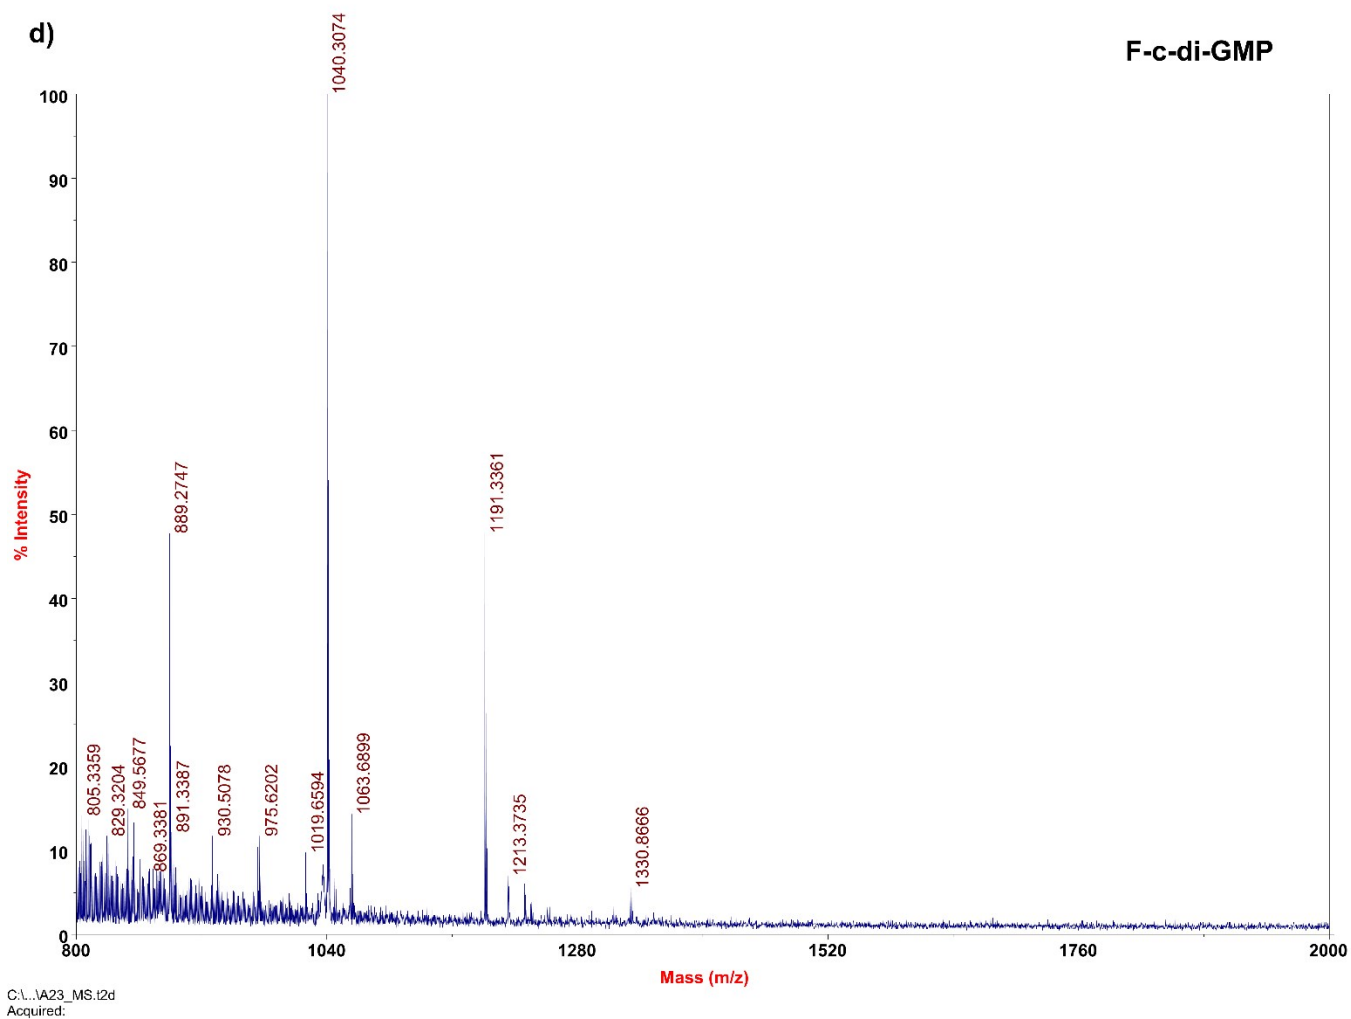

**Fig. S6.** MALDI-TOF Spectra of Fluorescent cyclic dinucleotides used for the fluorescence polarization assay. a) MALDI-TOF spectra of F-cGAMP-A. Manufacturer reported mass: 1174.9. Found: 1175.3380 ( $M+H^+$ ); b) MALDI-TOF spectra of F-cGAMP-B. Manufacturer reported mass: 1107.9. Found: 1108.1288 ( $M+H^+$ ); c) MALDI-TOF spectra of F-c-di-AMP. Manufacturer reported mass: 1158.9. Found: 1159.3912 ( $M+H^+$ ); d) MALDI-TOF spectra of F-c-di-GMP. Manufacturer reported mass: 1190.9. Found: 1191.3361 ( $M+H^+$ ).
